# Assessment of Depression in Cancer Patients

Peter C. Trask

It is widely known that depression exists in patients with cancer. The prevalence, however, varies widely by study and is often attributable to differences in assessment procedures. Attempts to identify accurate methods of assessing depression in cancer patients have employed different diagnostic approaches, assessment methods (e.g., self-report versus interview), and inclusion criteria. Unfortunately, all of these variables affect conclusions that can be drawn regarding the presence of depression in cancer patients. Other variables that can further affect the assessment of depression in cancer patients include individual differences such as the patient's age, gender, race/ethnicity, hospitalization status, and type and stage of cancer. Finally, the specific assessor and the timing of the assessment also likely affect conclusions about depression in cancer patients. This review was designed to succinctly address all of the above issues and identify several areas for future research, including refining diagnostic criteria for depression in cancer patients; creating cancer-specific depression measures with appropriate cutoffs; focusing on the issues of age, race, ethnicity, subculture, and type and stage of cancer in creating depression assessment tools; and exploring the issues of clinical versus subclinical depression, who and when to assess, and timely and cost-effective ways to assess. [J Natl Cancer Inst Monogr 2004;32:80–92]

As effective treatments for cancer continue to be identified and refined, increasing numbers of patients are obtaining either a cure or increased longevity, and more attention is being paid to the psychological issues that can accompany the diagnosis of and treatments for cancer. Studies have reported the presence of psychological disorders (i.e., anxiety, depression, adjustment disorders) in approximately 30% of patients (1–5), although this percentage varies depending on the specific disorder and study. The prevalence of depression, in particular, ranges from 1.5% to over 53% (6,7). Bukberg et al. (8) reported that roughly 25% of cancer patients report severe depressive symptoms, with the prevalence increasing in those with advanced illness to 77%. Additional information regarding the prevalence of depression in cancer has been reported by Massie (9).

Factors contributing to the variability in the prevalence of depression are many and include age and gender of the patient, hospitalization status, cancer diagnosis, and stage of cancer (i.e., diagnosis through end of life) (10). These issues also contribute to the difficulty in assessing depression in cancer patients. Other issues that are important when assessing for depression in this population include the diagnostic approach (e.g., inclusion, substitution), type of measure (i.e., diagnostic interviews versus self-report measures), and inclusion criteria (clinical versus subclinical) employed. This article discusses these issues, in addition to who should assess for depression and how it can be accomplished effectively. The ultimate goal is to be able to fully understand important issues in assessing depression in cancer patients to provide interventions to those who are most likely to benefit.

## DIAGNOSTIC APPROACHES

Depression is defined through the DSM-IV [*Diagnostic and Statistical Manual of Mental Disorders—Fourth Edition (11)*] as the presence of depressed mood or loss of interest or pleasure in nearly all activities for a period of at least 2 weeks. The individual must also present with four of the additional symptoms (Table 1). They include symptoms that can be conceptualized as encompassing somatic (e.g., weight/appetite, fatigue) and cognitive (e.g., poor concentration, guilt) changes from normal functioning that result in significant distress or impairment.

The diagnosis of depression in physically ill patients is difficult because symptoms of depression are often similar to those of the physical illness or its treatments. This is especially true when diagnosing depression in the cancer patient. Treatments for cancer (e.g., chemotherapy, biological therapy) often result in many of the symptoms needed for a diagnosis of depression such as fatigue, weight loss, anhedonia, and psychomotor retardation. As such, it is difficult to determine with reasonable accuracy the source of these symptoms. In an attempt to identify an accurate method of assessing depression in medical patients, and cancer patients in particular, researchers have employed four different approaches: inclusive, etiologic, substitutive, and exclusive (12,13). These approaches are summarized in Table 2.

### Inclusive

The inclusive approach uses all of the symptoms of depression, regardless of whether they may or may not be secondary to a physical illness (14), and is reflected in such interviews as the Schedule for Affective Disorders and Schizophrenia (SADS) and the Research Diagnostic Criteria. The result of employing this approach is high sensitivity (i.e., the ability to correctly identify those who are depressed), but lower specificity (i.e., the ability to correctly identify those who are not depressed). In other words, the tendency with this approach is to overdiagnose depression because of the lack of discrimination regarding the cause of the symptoms. This finding was observed by Kathol et al. (15), who reported an 8% drop in the prevalence of depression between an inclusive approach and removal of symptoms caused by cancer.

### Etiologic

In contrast, the etiologic approach (that used in the Structured Clinical Interview for DSM and Diagnostic Interview Schedule (DIS), as well as the DSM-III-R/IV) counts a symptom of depression only if it is clearly not the result of the physical illness (16). This approach has been suggested by Rodin et al.

Correspondence to: Peter C. Trask, PhD, Centers for Behavioral and Preventive Medicine, Coro Building, Ste. 500, 1 Hoppin St., Providence, RI 02903 (e-mail: peter\_trask@brown.edu).

DOI: 10.1093/jncimonographs/lgh013

Journal of the National Cancer Institute Monographs, No. 32, © Oxford University Press 2004, all rights reserved.

**Table 1.** DSM-IV symptoms of depression

|                                                            |
|------------------------------------------------------------|
| Depressed mood*                                            |
| Anhedonia*                                                 |
| Insomnia/hypersomnia                                       |
| Fatigue/loss of energy                                     |
| Significant weight/appetite change (increase or decrease)  |
| Psychomotor agitation/retardation                          |
| Worthlessness/guilt                                        |
| Reduced concentration, ability to think, or indecisiveness |
| Recurrent thoughts of death or suicide                     |

\*Either of these must be present for a diagnosis of major depressive episode by the DSM-IV criteria.

(17) as the best solution because it provides a more accurate view of the presence of depression. Unfortunately, as Cohen-Cole et al. (12) have pointed out, it is unlikely that the average psychiatrist can become familiar enough with all diseases to reliably determine whether a symptom of depression (e.g., fatigue) was a normal or excessive result of the physical illness. The result becomes a reliance on inference, a method of assessment that is typically unreliable. If such a determination is difficult for psychiatrists, it is likely to be close to impossible for other professionals dealing with depressed physically ill individuals.

### Substitutive

In an attempt to reduce confusion over the symptoms' cause, the substitutive approach replaces symptoms that may be related to the physical illness (e.g., fatigue) with additional cognitive symptoms (e.g., indecisiveness, hopelessness, pessimism) (18–20). Specific modified criteria were provided by Endicott (20), although other symptoms could be used. This approach has resulted in similar prevalence rates of depression when compared with the inclusive approach (15) and lower rates when compared with the etiologic approach (29% versus 49%). Others have noted that replacing somatic with psychological criteria offers no obvious advantage (21–23). An issue with this approach is that it affords great variability in the choice of the specific criteria that could be substituted and whether criteria

will (or should) differ depending on the physical illness. As such, Endicott (20) notes that if alternative symptoms are used, several issues should be considered. In particular, it is important to train evaluators thoroughly in the new symptoms to ensure consistent application of criteria to all patients, rationale for using the alternative symptoms should be provided to evaluators, and publication of results should occur with descriptions of the criteria used. This last point is most important when attempting to compare results.

### Exclusive

Finally, the exclusive approach eliminates two common symptoms of depression (i.e., fatigue and appetite/weight changes) that are frequently the result of a physical illness and uses only the other symptoms of depression (8,24). Although equally as pure as the inclusive approach, the exclusive approach suffers from the opposite problem; namely, increased specificity, but lowered sensitivity. The end result is a lower prevalence of depression with an increased likelihood of missed cases (false negatives) and fewer individuals meeting the restricted criteria (25).

Given the issues associated with each approach, it is difficult to conclude which of the four approaches is best for being able to correctly identify those individuals with cancer who are depressed and may benefit from an intervention. Although a combination of these approaches is likely in clinical practice, a focus on a single approach is more likely in research studies. This practice is perhaps unfortunate given that a recent study that used both the etiologic and substitutive approaches to assess depression obtained a lower prevalence rate than when using either one alone (26). This finding would indicate that a more comprehensive approach is more accurate in identifying individuals who are depressed, although it could be criticized as being an overly restrictive definition of depression. Unfortunately, busy nonpsychiatric clinic practices, effectiveness research studies, and time constraints often limit the practicality of conducting in-depth, comprehensive assessments. Employing approaches that can quickly and consistently identify depression in cancer patients would make it possible to overcome these practical limitations.

**Table 2.** Criteria for depression by each diagnostic approach

| Symptoms                            | Approach  |           |              |           |
|-------------------------------------|-----------|-----------|--------------|-----------|
|                                     | Inclusive | Etiologic | Substitutive | Exclusive |
| <b>General</b>                      |           |           |              |           |
| Depressed mood                      | X         | X         | X            | X         |
| Anhedonia                           | X         | X         | X            | X         |
| <b>Physical</b>                     |           |           |              |           |
| In/hypersomnia                      | X         | X         | X            | X         |
| Weight/appetite change              | X         | X         |              |           |
| Psychomotor agitation/retardation   | X         | X         | X            | X         |
| Fatigue/loss of energy              | X         | X         |              |           |
| <b>Psychological</b>                |           |           |              |           |
| Worthlessness/guilt                 | X         | X         | X            | X         |
| Poor concentration/indecisiveness   | X         | X         | X            | X         |
| Suicidal ideation/thoughts of death | X         | X         | X            | X         |
| Brooding                            |           |           | X            |           |
| Indecision                          |           |           | X            |           |

\*Etiologic differs from Inclusive in that it requires that a symptom count only if it is clearly not caused by a physical condition.

## HOW TO ASSESS: CLINICAL INTERVIEW VERSUS WRITTEN SELF-REPORT MEASURES

How to assess for depression can best be addressed by the following questions: What are the methods used for clinical assessment of depression throughout the course of cancer? And what is the evidence for their reliability and validity in cancer patients? In response to this, there are two approaches commonly used: clinical interviews and written self-report measures.

### Clinical Interviews

Structured clinical interviews have traditionally been considered the gold standard for identifying the prevalence, clinical significance, and potential treatment of depression because of their rigorous criteria. Common interviews include the SADS (27), Structured Clinical Interview for DSM (16), Research Diagnostic Criteria (25), and DIS (28). In addition, researchers and clinicians have used unstructured clinical interviews in which they diagnose depression based on DSM (29,30) or Endicott (26) criteria. Table 3 provides a sample of the most commonly used interviews for assessing depression in cancer patients.

Although they possess rigorous criteria, the problems with diagnosing depression using structured clinical interviews stem from the fact that the interviews were developed from one of the diagnostic approaches previously discussed. Thus, the problems with misclassification based on somatic symptoms would apply to the SADS, whereas arguments against the substitutive approach would apply to interviews using the Endicott criteria. In addition, structured clinical interviews have been criticized for the length of time they take to administer and the amount of training that they require for proficiency in administration and scoring (31), as well as for having little reliance on contextual information. Finally, they were developed and validated on a population devoid of significant comorbid physical illness. Hall et al. (32) point out that even clinical interviews are not completely reliable. As such, there can be some doubt as to whether they actually are the gold standard for all patients, particularly those patients with significant medical comorbidities.

Nevertheless, clinical interviews constitute the only way to obtain a diagnosis of depression and can be argued as essential in determining the true prevalence of a disorder. Interestingly, the aforementioned criticisms of structured clinical interviews are less applicable from a clinical perspective. For example,

**Table 3.** Commonly used clinical interviews for assessing depression in cancer patients\*

| Author (ref)             | Clinical interview                             | N   | Age range, y | Cancer diagnosis                     |
|--------------------------|------------------------------------------------|-----|--------------|--------------------------------------|
| Payne et al. (113)       | SCID (all versions)                            | 279 | NR           | Breast cancer                        |
| Passik et al. (47)       | MINI (DSM-IV criteria)                         | 60  | 58 ± 12      | Mixed                                |
| Maunsell et al. (114)    | DIS (DSM-III criteria)                         | 205 | 22–85        | Breast                               |
| Ciaramella and Poli (25) | Endicott criteria; SCID (DSM-III-R)            | 100 | 28–86        | Mixed                                |
| Worden (115)             | Semistructured interview                       | 120 | 30–80        | Mixed                                |
| Levine et al. (116)      | Interview (DSM-III criteria)                   | 100 | <50–>70      | Mixed                                |
| Massie et al. (117)      | Interview (DSM II criteria)                    | 334 |              | Mixed                                |
| Massie and Holland (118) | Interview (DSM-III criteria)                   | 546 | 10–>70       | Mixed                                |
| Razavi et al. (50)       | Clinical interview (Endicott criteria)         | 128 | 55 ± 14      | Mixed                                |
| Desai et al. (119)       | DIS (DSM-III criteria)                         | 72  | 61 ± 16      | Breast                               |
| Golden et al. (21)       | Semi-structured interview (DSM-III criteria)   | 65  | 20–86        | Gynecological                        |
| Silberfarb et al. (120)  | Structured interview                           | 146 | 30–80        | Breast                               |
| Plumb and Holland (23)   | Structured interview                           | 80  |              | Mixed                                |
| Derogatis et al. (1)     | DSM-III criteria                               | 215 | 50 ± 15      | Mixed                                |
| Bukberg et al. (8)       | Interview: Exclusive approach DSM-III criteria | 62  | 23–70        | Mixed                                |
| Morton et al. (121)      | DSM-III criteria                               | 48  | >60          | Oropharyngeal                        |
| Baile et al. (122)       | Clinical interview (DSM-III criteria)          | 89  | NR           | Head and neck                        |
| Lansky et al. (88)       | RDC (DSM-III criteria)                         | 500 | 17–80        | Mixed                                |
| Evans et al. (123)       | DSM-III criteria                               | 83  | 20–86        | Gynecological<br>(excluding ovarian) |
| Joffe et al. (124)       | SADS-Lifetime                                  | 21  |              | Pancreatic and gastric               |
| Grandi et al. (125)      | DSM-III criteria                               | 18  | 37–75        | Breast                               |
| Devlen et al. (126)      | Semistructured interview                       | 90  | 17–73        | Hodgkin's and non-<br>Hodgkin's      |
|                          |                                                | 120 | 40 ± 16      | lymphoma                             |
| Hardman et al. (127)     | Structured interview (ICD criteria)            | 126 | NR           | Mixed                                |
| Kathol et al. (14)       | DSM-III/III-R; RDC; Endicott criteria          | 808 | 16–88        | Mixed                                |
| Jenkins et al. (128)     | CIDI (DSM-III criteria)                        | 22  | 40–75        | Breast                               |
| Hall et al. (31)         | PSE                                            | 269 | < 79         | Breast                               |
| Colon et al. (129)       | DSM-III criteria                               | 100 | NR           | Acute leukemia                       |
| Hopwood et al. (52)      | CIS (DSM-III criteria)                         | 81  | NR           | Breast                               |
| Alexander et al. (28)    | Clinical Interview (DSM-III-R criteria)        | 60  | 53 ± 14      | Mixed                                |
| Sneeuw et al. (130)      | DIS (DSM-III criteria)                         | 556 | NR           | Breast                               |
| Chochinov et al. (22)    | SADS                                           | 200 | 60–80        | Mixed (Advanced<br>cancers)          |
| Hosaka and Aoki (131)    | Interview (DSM-IV criteria)                    | 50  | 57 ± 14      | Mixed                                |
| Spiegel et al. (87)      | SCID (DSM-III criteria)                        | 96  | 51 ± 15      | Mixed                                |
| Ibbotson et al. (48)     | PAS (DSM-III criteria)                         | 513 | 16–86        | Mixed                                |
| Berard et al. (29)       | SCID (DSM-IV criteria)                         | 100 | < 40–>59     | Mixed                                |

\*SCID = Structured Clinical Interview; DSM = Diagnostic and Statistical Manual; DIS = Diagnostic Interview Schedule; SADS = Schedule for Affective Disorders and Schizophrenia; RDC = Research Diagnostic Criteria; PSE = Present State Exam; CIS = Clinical Interview Schedule; PAS = Psychiatric Assessment Schedule.

Massie (33) has reported that a good assessment of depression includes symptom assessment, mental status, physical status, treatment effects, and laboratory data. Support for the presence of depression comes from a personal or family history of depression or suicide, concurrent life stresses, and the absence of social support. Consistent with the substitutive approach, Massie stresses that it is likely that the symptoms of weight/appetite change, insomnia, loss of energy, fatigue, psychomotor slowing, and decreased libido are less valuable in the diagnosis of depression in cancer patients given that they are likely confounders of the disease or treatment. Instead, a focus on the severity of dysphoric mood; degree of feelings of hopelessness, guilt, and worthlessness; and presence of suicidal thoughts are likely to be more effective (33). In essence, Massie notes that a thorough clinical interview that focuses less on the somatic and more on the cognitive symptoms of depression, in addition to variables such as family history and so on, is important for identifying depression in the patient with cancer.

Although this information is almost always obtained in a thorough clinical interview before treating a patient, it is less likely to be obtained as part of a research study that uses a structured clinical interview. As such, for patients who are subsequently going to be receiving treatment, it would appear that the clinical interview is an important and necessary step for generating hypotheses about the cause of depression. In addition, because the individual who does the assessment is likely to be the one providing the treatment, there would be less concern for some of the drawbacks of this approach (e.g., clinician bias, questionable psychometrics, potentially incomplete inquiries). Neither the unstructured nor the structured clinical interview, however, appear to be the best approach for identifying individuals who may be at increased risk for depression and who would potentially benefit from a psychological intervention. This latter goal seems better served by written self-report measures.

### Written Self-Report Measures

Written self-report measures constitute another approach for assessing depression in cancer patients. Their use in the assessment of depression in cancer patients is strengthened by their ease of administration and scoring by individuals who have not received extensive training, and the speed with which they can be completed by patients. In addition, written self-report instruments are further strengthened by their ability to obtain a gross assessment before a direct interview, quantify severity of depression, identify changes over time, and be used in busy practices (34).

A variety of written self-report measures are commonly used to identify symptoms of depression in cancer patients. These include the Hospital Anxiety and Depression Scale (HADS) (35), the Rotterdam Symptom Checklist (RSCL) (36), the Beck Depression Inventory (regular and short forms) (37,38), the Brief Symptom Inventory-Depression scale (39–41), Center for Epidemiologic Studies Depression Scale (CES-D) (42), and the Zung Self-Rating Depression Scale (both full and brief forms) (43,44). Table 4 presents several of the more frequently used written self-report measures used to assess depression in cancer patients.

For written self-report assessments to be helpful in the identification of depression, they must demonstrate acceptable reliability, criterion validity, sensitivity, and specificity. In brief, reliability refers to the ability of a measure to obtain the same

score on multiple occasions, or the consistency with which responses are made to the instrument, and must occur before assessing validity. The criterion validity of a measure refers to its correlation with an accepted standard (e.g., a clinical interview). Sensitivity and specificity have been previously discussed (45). Two other issues, the misclassification rate and the positive predictive value are also important in identifying the usefulness of a measure. The misclassification rate is the number of people who are identified as either false positives or false negatives, whereas the positive predictive value of a test refers to the probability of a score at or above a chosen cutoff point being a true case. The latter takes into account only true cases and false positives. Given these definitions, it can be seen that cutoff scores are directly related to the issue of sensitivity and specificity, as a high cutoff score decreases sensitivity and increases specificity and a low cutoff score increases sensitivity and decreases specificity (31). As such, an optimal cutoff score must be identified on each screening measure of depression. Failure to choose an appropriate cutoff score or to use a measure with low sensitivity and specificity results in inaccurate classification of depressed individuals, as well as significant differences in the number of subjects needed to find clinically important differences (32).

As with the structured clinical interviews, written self-report measures have been created consistently with one of the aforementioned diagnostic approaches. For example, the HADS removes the somatic symptoms of depression, whereas the Beck Depression Inventory and the Zung include them; interestingly, the Brief Zung has removed the somatic symptoms of depression. The arguments for and against including somatic items, as previously noted, focus on the desire to reduce the number of false positives and to remove potentially confounding items. There is equivocal sentiment, however, over which instruments should be used (46,47).

Regardless of the measure used, given the complicated issue of balancing false positives with false negatives and sensitivity with specificity, it is clear that choosing the correct or optimal cutoff score for identifying depressed patients is critical. From a practical perspective, on some measures this equates to choosing a score one or two standard deviations above the mean as a cutoff score. Ideally, choosing the “best” cutoff, some of which are presented in Table 5, would allow for a balance, thereby allowing the most efficacious treatments to be provided to those most in need. The importance of the choice of cutoff score was reflected by Passik et al. (48) in their study of the characteristics of the full and brief Zung Self-Rating Depression Scale. They noted that although there is no right or wrong cutoff, they subsequently identified the best choices for cutoffs on the full and brief Zung for reducing false positives.

The majority of research on depression in cancer patients has used the HADS, with much of this research focused on identifying the optimal cutoff scores for depressed patients with cancer. Often this has been done in combination with the RSCL or clinical interviews. Unfortunately, which cutoff score to use has often varied by study. For example, using a HADS unitary scale cutoff score of 14, Ibbotson et al. (49) noted that the HADS performed well in identifying depression for patients who were disease free or with stable disease, but not with progressive disease. In contrast, focusing on women with early breast cancer, Ramirez et al. (50) used the HADS as a unitary scale with 11 as the threshold and found

**Table 4.** Written self-report measures for assessing depression in cancer patients and the cutoffs employed\*

| Author (ref)                  | Measure        | Cutoffs                                                          | % depressed                                      | Cancer population                                                            |
|-------------------------------|----------------|------------------------------------------------------------------|--------------------------------------------------|------------------------------------------------------------------------------|
| Lloyd-Williams et al. (132)   | HADS           | 8<br>11<br>(D subscale)                                          | 63<br>32                                         | Mixed metastatic                                                             |
| Payne et al. (113)            | HADS           | 10<br>13                                                         | 33<br>27                                         | Breast (43% no cancer; 11% Stage I; 31% stage 2; 7% stage III; 51% Stage IV) |
| Hopwood et al. (132)          | HADS           | 8-10<br>11+<br>(D subscale)                                      | 21<br>9                                          | Breast                                                                       |
| Pinder et al. (89)            | HADS           | 11<br>(D subscale)                                               | 12                                               | Breast (advanced disease)                                                    |
| Razavi et al. (50)            | HADS           | 19<br>(total scale)                                              | NR                                               | Mixed                                                                        |
| Maraste et al. (6)            | HADS           | 8-10<br>11+<br>(D subscale)                                      | 10<br>3                                          | Breast (conservation and mastectomy surgery)                                 |
| Lees and Lloyd-Williams (134) | HADS           | 19<br>(total scale)                                              | 40                                               | Mixed malignant disease                                                      |
| Hosaka and Aoki (131)         | HADS           | 8<br>(D subscale)                                                | 28                                               | Mixed                                                                        |
| Berard et al. (29)            | HADS           | >7<br>>9                                                         | 14<br>8                                          | Mixed                                                                        |
|                               | BDI            | >13<br>>15                                                       | 20<br>14                                         |                                                                              |
| Hall et al. (31)              | HADS           | 7<br>8<br>11<br>(D subscale)                                     | 18.4<br>16.5<br>7.5                              | Breast (early stage)                                                         |
|                               | RSCL           | 7<br>8<br>11                                                     | 43.1<br>32.2<br>18.5                             |                                                                              |
| Ibbotson et al. (48)          | HADS           | 14                                                               | NR                                               | Mixed                                                                        |
|                               | RSCL           | 7                                                                | NR                                               |                                                                              |
| Dugan et al. (33)             | ZSRDS          | SDS index score:<br>50-59 mild<br>60-69 moderate<br>70+ severe   | 21.5<br>12.5<br>1.9                              | Mixed (half with early stage disease)                                        |
|                               | BZSRDS         | SDS index score:<br>22-32 mild<br>33-38 moderate<br>39-44 severe | 17.9<br>8.4<br>4.8                               |                                                                              |
| Passik et al. (47)            | ZSRDS          | SDS Raw score:<br>40-47 mild<br>48-55 moderate<br>56-80 severe   | NR                                               | Mixed (convenience sample)                                                   |
|                               | BZSRDS         | SDS Raw score:<br>22-32 mild<br>33-38 moderate<br>39-44 severe   | NR                                               |                                                                              |
| Ciaramella and Poli (25)      | HRSD           | 7+ presence<br>16+ moderate-severe                               | NR                                               | Mixed                                                                        |
| Middelboe et al. (135)        | HRSD           | 13-17<br>>17                                                     | 33<br>14                                         | Mixed (patients undergoing chemotherapy)                                     |
| Lansky et al. (88)            | HRSD and ZSRDS | 20 HRSD and 50 ZSRDS                                             | 5.3                                              | Mixed                                                                        |
| Kurtz et al. (136)            | CES-D          | 16+                                                              | 38.9 @ T1<br>32.5 @ T2<br>34.3 @ T3<br>30.9 @ T4 | Lung (geriatric patients)                                                    |
| Vernon et al. (137)           | CES-D          | 16+                                                              | 24                                               | Colorectal                                                                   |
| Spiegel et al. (87)           | CES-D and BDI  | NR                                                               | NR                                               | Mixed                                                                        |
| McLachlan et al. (138)        | BDI-SF         | 8-15 moderate<br>16+ severe                                      | 12<br>3                                          | Mixed, any clinical stage                                                    |
| Frost et al. (139)            | BSI            | NR                                                               | NR                                               | Breast                                                                       |
| Epping-Jordan et al. (140)    | SCL-90-R       | T score = 63                                                     | 34                                               | Breast                                                                       |

\*HADS = Hospital Anxiety and Depression Scale; D = Depression; ZSRDS = Zung Self-rating Depression Scale; BZSRDS = Brief Zung Self-rating Depression Scale; RSCL = Rotterdam Symptom Checklist; HRSD = Hamilton Rating Scale for Depression; BDI-SF = Beck Depression Inventory-Short Form; CES-D = Center for Epidemiological Studies-Depression Scale; BSI = Brief Symptom Inventory; SCL-90-R = Symptom Checklist-90-Revised; NR = not reported.

a sensitivity of 70% in identifying psychiatric disorder pre-operatively. This varied by the age of the woman, however, as women <50 years of age demonstrated a 90% sensitivity and a 40% false positive rate using 11 as the threshold, but in

women >50 years of age the sensitivity was 57% and the false positive rate was 3%. Razavi et al. (51) used ROC curves on the HADS and reported that for screening for major depression, the optimal cutoff score was 19, associated with

70% sensitivity and 75% specificity for screening major depressive disorders only in a sample of inpatients. Interestingly, a lower cutoff point was found as optimal in a population of lymphoma outpatients (52).

In contrast to the use of the HADS as a unitary scale (which includes both anxiety and depression subscales), others have focused on the HADS depression scale only. As an example, Hopwood et al. (53) reported that the HADS had optimal sensitivity and specificity with a threshold of 11 on the depression scale, correctly identifying 75% of those suffering from an affective disorder; however, misclassification of patients using this scale was 25%. Hall et al. (32) used the HADS, RSCL, and Present State Exam (PSE) and found that only 14 women were classified as depressed on both the HADS and PSE when using a threshold of 11 on the depression scale of the HADS. In contrast, 99 (37.2%) women had been assessed as depressed using the PSE. Thus, the sensitivity was 14.1% and the specificity was 98.2%. Sensitivity was increased, but specificity decreased as the threshold was lowered. The authors conclude that using a threshold of 11 on the HADS scales yielded unacceptably low sensitivity and that lowering the threshold to 7 did not result in reasonably accurate screening for depression, although they qualify this by noting that the PSE may have identified too many cases. Although this finding was in contrast to others who have used the HADS (49,51,53), it led to the conclusion that the HADS may be inappropriate for screening

in the cancer population (32). Should the HADS continue to be used as a screening tool, Aapro and Cull (10) suggest that it should be followed by further assessment designed to assess the number and severity of depressive symptoms relative to recognized diagnostic criteria; a recommendation that could be applied to any self-report measure.

Table 5 presents the sensitivity, specificity, misclassification rate, and positive predictive value for several written self-report measures used with cancer patients. As can be seen, there is noticeable variability in the findings that may be attributable to differences in validation measures, sample studied, or other issues specific to the particular study. This makes choosing instruments even more difficult, even when attempts have been made to use the literature to inform those choices.

Despite their ease of use and other strengths, written self-report measures have some limitations. Among them is the fact that written self-report instruments measure depressive symptomatology but do not provide diagnoses. Comparison of findings from written self-report measures with those from structured and unstructured clinical interviews has prompted some authors to note that significant numbers of patients report the presence of symptoms of depression, but relatively few have symptoms that are indicative of severe depression (34,54). It remains debated as to the disruptive effects depressive symptomatology has on individuals (55). In addition, written self-

**Table 5.** Cut-off points on self-report measures with associated sensitivity, specificity, misclassification rate, and positive predictive value (PPV)\*

| Author (ref)                | Measure    | Validation measure                    | Cutoff                | Sensitivity, % | Specificity, % | Misclassification rate, % | PPV, % |
|-----------------------------|------------|---------------------------------------|-----------------------|----------------|----------------|---------------------------|--------|
| Lloyd-Williams et al. (132) | HADS       | PSE (ICD-10)                          | 19                    | 68             | 67             | NR                        | 36     |
|                             |            |                                       | (unitary scale)       | 11             | 54             | 74                        | NR     |
|                             |            |                                       | (depression subscale) |                |                |                           |        |
| Payne et al. (113)          | HADS       | SCID (DSM-III-R)                      | 13                    | NR             | NR             | NR                        | 75     |
| Ramirez et al. (49)         | HADS       | Diagnostic rating criteria            | 11                    | 70             | NR             | NR                        | NR     |
|                             |            |                                       | (unitary scale)       |                |                |                           |        |
| Ibbotson et al. (48)        | HADS       | DSM-III                               | 14                    | 80             | 76             | NR                        | 41     |
|                             | RSCL       |                                       | 7                     | 83             | 71             |                           | 37     |
| Razavi et al. (50)          | HADS       | Endicott criteria                     | 19                    | 70             | 75             | NR                        | NR     |
|                             |            |                                       | (unitary scale)       |                |                |                           |        |
| Hopwood et al. (52)         | HADS       | Clinical Interview Schedule (DSM-III) | 11                    | 75             | 75             | 25                        | 55.6   |
|                             |            |                                       | (depression subscale) |                |                |                           |        |
| Hall et al. (31)            | RSCL       |                                       | 11                    | 75             | 80             | 21                        | 42.9   |
|                             | HADS       | PSE (DSM-III)                         | 11                    | 14.1           | 98.2           | 34.2                      | 82     |
|                             |            |                                       | (depression subscale) |                |                |                           |        |
| Berard et al. (29)          | RSCL       |                                       | 11                    | 30.6           | 95.9           | 29.9                      | 90     |
|                             | HADS       | DSM-IV criteria                       | 8                     | 71             | 95             | 10                        | 79     |
|                             | BDI        |                                       | 10                    | 43             | 96             | 15                        | 75     |
|                             |            |                                       | 14                    | 90             | 90             | 13                        | 63     |
|                             |            |                                       | 16                    | 86             | 86             | 7                         | 82     |
|                             | HADS & BDI |                                       | 8 and 16              | 95             | 91             | 8                         | 74     |
| Passik et al. (47)          | ZSRDS      | MINI                                  | >40                   | 55.56          | 100            | 26.7                      | NR     |
|                             |            |                                       | >48                   | 86.11          | 66.67          | 21.7                      |        |
|                             |            |                                       | >56                   | 100            | 33.33          | 26.7                      |        |
|                             |            |                                       | >22                   | 41.67          | 95.83          | 36.7                      |        |
|                             |            |                                       | >33                   | 97.22          | 29.17          | 30                        |        |
|                             | BZSRDS     |                                       | >39                   | 100            | 0              | 40                        |        |
| Doetch et al. (141)         | GDS        | NR                                    | 11                    | 84             | 95             | NR                        | NR     |
| Schein and Koenig (77)      | CES-D      | DSM-III-R criteria                    | 20                    | 61.5           | 94             | NR                        | 84     |

\*HADS = Hospital Anxiety and Depression Scale; ZSRDS = Zung Self-rating Depression Scale; BZSRDS = Brief Zung Self-rating Depression Scale; RSCL = Rotterdam Symptom Checklist; GDS = Geriatric Depression Scale; CES-D = Center for Epidemiological Studies-Depression Scale; PSE = Present State Exam; ICD = International Classification of Disease; SCID = Structured Clinical Interview; DSM = Diagnostic and Statistical Manual; NR = not reported.

report measures are limited by their lack of rigorous criteria and potential to lead to overdiagnosis and high false positives (31).

## Conclusions

Both structured and unstructured clinical interviews and written self-report measures are available for assessing depression. These approaches are limited by the fact that they follow a diagnostic approach that was initially developed to assess depression in patients without comorbid physical illness. Despite that, the HADS represents a written self-report measure explicitly developed for assessing depression with patients in an outpatient medical setting (35), with confirmation of its factor structure obtained in patients with cancer (56). The limited validation of measures (written self-report and interviews) on cancer patients specifically indicates that there is clearly a need for future research. There is also the need for identifying carefully calibrated screening methods and their cutoff scores for the setting in which they are applied (10). This issue is related to that of clinical versus subclinical levels of depression. It is perhaps premature to conclude that symptoms of depression present in the absence of a clinical syndrome do not require further examination and perhaps treatment. Potential research strategies to resolve these issues include determining the effect of subclinical and clinical depression on the quality of life of the patient, medical use, and adherence to medical regimens. In addition, comparing the efficacy of interventions for reducing depressive symptoms in both of the populations would potentially identify the optimal intensity or duration of an intervention. Finally, additional research is needed to determine cutoffs on screening measures that reliably and validly differentiate individuals with subclinical versus clinical depression. Until research studies are designed to resolve these issues, when treating depression in cancer patients, screening instruments should be followed by more detailed medical assessments (and one would assume psychological assessments) (31).

## DEVELOPMENTAL ISSUES PERTINENT TO ASSESSING DEPRESSION

The majority of the studies in the preceding discussion assessed depression in adult cancer patients, although the age ranges varied widely and often included individuals who could be classified as elderly or old age. A separate body of literature focuses on depression in children with cancer. Both children and the elderly, however, have issues that need to be considered when assessing depression in the cancer patient.

### Depression in Children

The diagnosis of depression in children without cancer is made difficult by the fact that the clinical picture is frequently different from that of adults. In particular, younger children are more likely to demonstrate anxiety and somatic symptoms, temper tantrums, and behavioral problems, whereas the traditional cognitive components of depression (e.g., low self-esteem, guilt, and hopelessness) are not observed until middle to late childhood (57). In addition, recognition of depression in adolescents is difficult because there is the expectation that teens will be "moody." Important symptoms in adolescents include sleep and appetite disturbance, irritability, and impairment in functioning. Further difficulty assessing depression stems from

the fact that depression may be masked by anger/irritability, cutting behaviors, or eating disorders, and that younger children may have difficulty verbalizing thoughts and feelings (C.A. Dittner, personal communication, 12 March 2002).

Given the difficulties with assessing depression in children, it has been argued that the best approach is to use a structured clinical interview, such as the Schedule for Affective Disorders and Schizophrenia for School-Age Children (KSADS) (58) or Diagnostic Interview Schedule for Children (59), with multiple informants, given that teachers and parents observe different behaviors in children that may be associated with depression. Similar to the SADS, the KSADS is a structured clinical interview for diagnosing psychiatric disorders in childhood. Both the child and the caregiver are interviewed. The KSADS has been reported to be too long to administer in clinical settings, and like the SADS, it requires extensive training. In addition, low correlation between parent and child reports makes it a poor approach for assessing depression in younger children (60). Likewise, little information is available on the ability of the Diagnostic Interview Schedule for Children to correctly identify children with true major depression, as well as on its concurrent validity (61).

Written self-rating scales have also been identified for assessing depressive symptoms in children and include such measures as the Child Depression Inventory (CDI) (62,63), Center for Epidemiological Studies Depression Scale for Children (64), and Youth Self Report (65). As with the adult measures, these are good for screening symptoms, checking the severity of depressive symptoms and monitoring progress in treatment. Both the CDI and the Youth Self Report, however, are rated by the child and as such require certain levels of reading comprehension and metacognitive ability. The ability to reflect on the self is a quality not present in children under the age of 8 years. Indeed, the majority of assessment instruments does not address the level of child competence and potentially limit the accuracy of the measure (62). In addition, Fristad et al. (66) found that studies using the CDI frequently misused the instrument (e.g., as a diagnostic tool) and noted that caution in the administration and interpretation of self-report measures of depression in children is needed. Additional problems with written self-report measures in children include low specificity and the potential for random responses by adolescents. All of these problems require that additional reports be obtained by parents/teachers and behavioral observations of the children.

The issues of assessing depression in children are compounded when the child has been diagnosed with cancer. Added to the aforementioned issues are those concerning whether the symptoms observed in the child are the result of the disease or treatment, isolation from friends and family, or change in daily routine that frequently accompanies treatment for cancer. Interestingly, in studies that have assessed depression in children, a consistent finding is that depression in children and adolescents with cancer is no more prevalent than in the general population (67–72). Explanations for this finding have included the increased use of avoidance or defensive coping strategies (73–75) and have led to suggestions that specific symptoms of depression (e.g., anhedonia) be investigated (76). Despite the use of measures such as the CDI in pediatric cancer populations, however, there are few, if any, studies that have specifically undertaken the task of validating a measure of depression in a pediatric cancer sample.

## Depression in the Elderly

As with children, the diagnosis of depression in older adults (>65 years of age) without cancer is occasionally made difficult by variations in symptom presentation. The presence of somatic symptoms that occur frequently in elderly individuals such as changes in appetite, sleep, and fatigue increase the possibility of obtaining higher false-positive rates (77,78). In addition, issues such as the presence of dementia, delirium, cognitive impairments, or a performance status that does not allow one to provide responses on their own make the assessment of depression more challenging (79). In individuals who are able to complete questionnaires, in terms of symptoms of depression endorsed, Passik et al. (80) found that significantly higher scores were obtained on the cognitive factor of the Zung by individuals over 80 years when compared with 50–69 year olds.

In addition to the written self-report measures that are used with adults, there are additional questionnaires that have been created specifically for assessing depression in the elderly. These have been designed to reduce the focus on somatic concerns. Most notable among them is the Geriatric Depression Scale (GDS) (81), a 30-item questionnaire with binary (yes/no) response choices. The GDS was developed by expressly eliminating the somatic items commonly included in other depression measures. Cutoff scores with acceptable sensitivity and specificity have been identified (81), with a score between 10 and 20 representing “mild” depression and a score  $\geq 20$  representing “severe” depression (77). A shorter, 15-item, version of the GDS has also been created with cutoff scores that provide adequate sensitivity and specificity (82).

The concern that was previously noted in removing somatic items from the assessment of depression in cancer patients has also been expressed with assessments of depression in the elderly, the argument being that the profile of depression in the elderly is as likely to include somatic symptoms as it is cognitive and that excluding such items may result in missed symptom information and cases of depression (78). Attempts to determine the veracity of this position have resulted in attempts to validate self-report measures that include somatic items (such as the CES-D) in physically ill elderly patients. Evaluation of the CES-D by Schein and Koenig (78) revealed that a cutoff score of 16 resulted in an unacceptably high false-positive rate. Their findings did not support the use of the stringent cutoff of 27 identified by some researchers (83,84) and noted that a score of 20 resulted in the highest hit rate and provided an accurate proxy for a diagnosis.

To sum, there appear to be several assessment approaches that can be used to identify depression in the elderly, including those who are physically ill. Of note is the fact that functional deficits may make it difficult to obtain an accurate assessment of depression. In such cases, the use of additional informants, such as caregivers, children, or staff, may be necessary to further clarify the presence of depression. Research is needed that specifically validates measures of depression on elderly depressed cancer patients.

## DISEASE STATUS AND DEPRESSION

Equivocal findings have been reported on whether the prevalence of depression varies by cancer type or stage. Although

Zabora et al. (85) found differences in depression prevalence between cancer diagnoses, many have failed to identify significant amounts of variation by either type or stage of cancer (2,86,87). Despite this, two areas that frequently vary by stage of cancer have been related to an increased presence of depression: increased pain and decreased performance status. Increased pain, and specifically increased pain with metastasis (which occurs with stage IV disease), has been associated with increased depression and may play a causal role, as individuals with high levels of pain had significantly lower previous histories of major depression (88). Ciaramella and Poli (26) in their study of 100 cancer outpatients, 30 of whom had metastases and 37 of whom had pain, found that depression and pain were related, with about half of pain patients having a major depressive episode. They hypothesized that depression follows pain and metastasis, and used as confirmation the fact that their patients with current depression did not have more lifetime depressive episodes than those without depression. As such, they concluded that depression is not endogenous to cancer patients, but follows from the presence of other stressors such as pain. Their findings indicate that an assessment of depression should also include an assessment of pain, especially in those individuals with metastatic cancer.

Decreased performance status is also a potential concomitant to advanced cancer stage and has been found to be related to the presence of depression. Bukberg et al. (8) in their study of hospitalized patients found that of those with a score on the Karnofsky Performance Rating Scale of 40 or less (bed restriction), 77% met criteria for major depression. Karnofsky performance status as well as a history of depression were found to be factors associated with comorbid depression (89). Similar findings were also reported by Pinder et al. (90) in a sample of patients with advanced breast cancer. Specifically, patients confined to bed at least 50% of the day (International Union Against Cancer [UICC] scale 3 and 4) had an odds ratio of 9.1 of being clinically depressed when compared with those who had no symptoms.

In addition to the presence of pain and decreased performance status, which clearly are related to the prevalence of depression, there are issues pertinent to the assessment of depression that may vary by type or stage. For example, individuals with head and neck cancer may find it very difficult to complete structured interviews because of changes in their ability to speak. In such cases, identification of alternative methods of assessment, such as questionnaires or observer ratings, may be necessary.

## RACE, ETHNICITY, AND SUBCULTURAL ISSUES

Of ever-increasing importance, although still underrepresented in the literature, is the identification of issues when assessing depression in cancer patients that may be specific to different racial, ethnic, or subcultural groups. A limited review of the literature on the assessment of depression over the past 10 years revealed that the racial breakdown of the sample was only provided in approximately 25% of the studies. In additional studies, results were reported as not differing by racial status without providing the racial composition of the sample (91). In those studies that did provide a racial distribution, Caucasians made up between 50% and 99% of the sample, with the majority of studies being >85% Caucasian. The exceptions were studies



with pediatric cancer patients by Varni et al. (92) and Frank et al. (75), who reported that 50% and 59% of their samples, respectively, were Caucasian.

Often, the issues of race and ethnicity are confused. As an example, in the two aforementioned studies, African-American and Caucasian races are included in sentences that describe “other ethnic groups” as being Hispanic, Asian, Indian, Vietnamese, and American Indian (75,92). Thus, it would appear that in these studies, Caucasian and African-American are considered ethnic groups. This is somewhat misleading, given that ethnicity refers to a “common ancestry through which individuals have evolved shared values and customs” (93) and interacts with issues such as race, religion, geography, and so forth. On the basis of this definition, studies often assume equality among racial groups that are inherently different based on this definition as evidenced by the various groups that are classified in the “other” category. As a result, assessing depression in these groups using measures/instruments that have been standardized on Caucasian samples may be ignoring individual differences that could affect the reporting of symptoms, severity of symptoms, and validity of symptom patterns within all of these groups. Finally, acculturation and generational issues are likely important in assessing depression in cancer patients of different cultures. It is unlikely that a new immigrant and a fifth-generation citizen from the same country of origin will have similar presentations of depression, even if they are of similar age and gender.

### WHO SHOULD ASSESS?

The question of who should assess for depression is more than academic because traditionally, nonpsychiatric physicians have difficulty identifying depression, patients are reluctant to spontaneously report symptoms of depression, and as noted before, symptoms associated with cancer (fatigue, sleep difficulties, loss of appetite) are also symptoms of depression, but are frequently attributed to the physical illness instead (80). The identification of depression becomes additionally important because depression may decrease motivation and adherence with chemotherapy (94). Unfortunately, although screening instruments meant to identify patient depression are often self-report and easy to administer, they generally are not a standard part of current clinical medical practice. More often, it is an informal assessment of depression by health care providers (e.g., nurses, physicians) that prompts a referral to a psychologist or psychiatrist for formal assessment.

Informal assessments by nonpsychiatric medical staff, however, may not be an effective method of screening for depression. This is in part because less than one-quarter of depressed cancer patients are likely to report their symptoms to nonpsychiatric medical staff (95–98). In addition, the concordance between patient and staff evaluations of depression are not encouraging. When associations between patient and staff ratings have been examined, correlations ranging from 0.21 to 0.50 have been reported (99,100). Agreement between patient and staff ratings of depression using Cohen’s kappa statistic has been reported between 0.07 and 0.23 (101). Although interpretations of these associations may vary [see Lampic and Sjoden (102) for a review], it is clear that the agreement between patient and provider ratings of depression is less than perfect. Some studies have noted that staff tend to overestimate depression in their

patients (101–105), whereas others have found that this is not the case (106,107). As an example, a recent study by Sollner et al. (108) examined the ability of oncologists to identify depression in their patients and found better detection of moderate than high levels of depression, resulting in overall poor agreement between oncologist and patient ratings on the HADS. This discrepancy implies that staff may identify some aspects of depression more easily than others (109–110). Additional research has found that the patient ratings of depression on self-report scales that are most highly correlated with physician ratings are the obvious symptoms of depression such as irritable mood, crying, or statements concerning thoughts or death or suicide (80). The tendency for physicians to assess depression based on the observable symptoms and not on cognitive factors led Passik et al. (80) to conclude that further training and education among oncologists is needed if they are to accurately assess for mood disturbances in their patients. If mental health professionals are not an integral part of the oncology team, the aforementioned suggestion is of utmost importance if depression and other mental health issues are to be recognized.

### WHEN TO ASSESS

Equally as important as who should assess is the issue of when to assess. In the majority of clinical research studies, patients are assessed before or following an intervention, or as part of long-term follow-up of cancer survivors. Using bone marrow transplantation as an example, patients are routinely assessed before undergoing the procedure. Additional assessment frequently occurs at 100 days posttransplant, although this varies by center and research project. Depression has been identified as prevalent at each of these occasions (111–113). Given the nature of the procedure, it would appear that these assessment points should be standard, although depression is not usually formally assessed unless patients are part of a research protocol. Thus, there is clearly a need for consistent assessment of depression in all cancers and procedures, not just BMT, throughout the treatment process. Recently, Trask et al. (47) have suggested that assessment of depression and distress in general should occur even earlier for some patient populations. Examining the presence of depression in patients who were presenting at a consultation to determine if they would be appropriate for a BMT, they found a 20% prevalence of depression using the HADS, but a 50% prevalence of anxiety and distress. This finding, coupled with those of other studies of cancer patients, strongly indicates that routine assessment of depression is valuable and necessary.

### FUTURE DIRECTIONS

This review has discussed the issues of how, who, and when to assess for depression in cancer patients. It has also presented the importance of considering issues such as age, ethnicity, or stage/site of cancer that may influence the assessment of depression. Based on this discussion, there are several issues that are important to address in future studies. First, to effectively identify depression, there is the need to refine diagnostic criteria for depression in cancer patients. This could be accomplished through studies that assess patients using a combination of the inclusive and substitutive approaches previously discussed and examine which symptoms of depression are most common in

cancer patients. It is possible that the result would be two separate depression subtypes, somatic and cognitive, which may have very different effect on disease course, morbidity, or quality of life, and that may respond quite differently to interventions. Second, it would be helpful to create cancer-specific depression measures with appropriate cutoffs. This could occur through the creation of a new measure from a combination of existing measures of depression or by obtaining a set of items through interviews with cancer patients. Both approaches would require a demonstration of adequate psychometrics but would reflect a measure that was generated and tested on a specific population.

Third, there is a need to focus on the issues of age, race, ethnicity, subculture, and type/stage of cancer in creating depression assessment tools. Increased efforts are needed to include diverse groups in depression studies, create norms on existing measures for those groups, or create new measures sensitive to the variations that could occur because of ethnicity or subculture. Finally, there is the need to explore the issues of clinical versus subclinical depression, who and when to assess, and timely and cost-effective ways to assess for depression. Devising studies to look at the effect of clinical and subclinical depression on outcomes to determine whether differences exist, as well as to determine whether those groups have similar responses to interventions, is an important first step. Longitudinal studies that use various personnel to assess depression could provide information on when depression is most problematic and whether there are discrepancies between assessors that may be amenable to future training. Finally, developing quick, few-item measures with sound psychometric properties that can be administered through kiosks in waiting rooms, personal digital assistants, or paper and pencil may identify cost-effective assessment techniques. Exploring these issues will result in a better understanding of the specific ways depression is manifested in cancer patients and may lead to the development of more effective interventions.

## REFERENCES

- (1) Derogatis LP, Morrow GR, Fetting J, Penman D, Piasetsky S, Schmale AM, et al. The prevalence of psychiatric disorders among cancer patients. *JAMA* 1983;249:751–7.
- (2) Stefanek ME, Derogatis LP, Shaw A. Psychological distress among oncology outpatients. *Psychosomatics* 1987;28:530–9.
- (3) Farber DM, Wiernerman BH, Kuypers JA. Psychosocial distress in oncology outpatients. *J Psychosoc Oncol* 1984;2:109–18.
- (4) Sollner W, Zingg-Schir M, Rumpold G, Mairinger G, Fritsch P. Need for supportive counselling—the professionals' versus the patients' perspective. A survey in a representative sample of 236 melanoma patients. *Psychother Psychosom* 1998;67:94–104.
- (5) Trask PC, Paterson AG, Hayasaka S, Dunn RL, Riba M, Johnson T. Psychosocial characteristics of individuals with non-stage IV melanoma. *J Clin Oncol* 2001;19:2844–50.
- (6) Maraste R, Brandt L, Olsson H, Ryde-Brandt B. Anxiety and depression in breast cancer patients at start of adjuvant radiotherapy. *Acta Oncol* 1992;31:641–3.
- (7) Craig TJ, Abeloff MD. Psychiatric symptomatology among hospitalized cancer patients. *Am J Psychiatry* 1974;131:1323–7.
- (8) Bukberg J, Penman D, Holland JC. Depression in hospitalized cancer patients. *Psychosom Med* 1984;46:199–12.
- (9) Massie M, J. Prevalence of depression in patients with cancer. *JNCI Monogr* 2004;32:57–71.
- (10) Aapro M, Cull A. Depression in breast cancer patients: the need for treatment. *Ann Oncol* 1999;10:627–36.
- (11) American Psychiatric Association: Diagnostic and statistical manual of mental disorders, 4th ed. Washington (DC): American Psychiatric Association; 1994.
- (12) Cohen-Cole SA, Brown FW, McDaniel JS. Assessment of depression and grief reactions in the medically ill. In: Stoudemire A, Fogel BS, editors. *Psychiatric care of the medical patient*. New York (NY): Oxford University Press; 1993. p. 53–69.
- (13) McDaniel JS, Brown FW, Cole SA. Assessment of depression and grief reactions in the medically ill. In: Stoudemire A, Fogel BS, Greenberg DB, editors. *Psychiatric care of the medical patient*, 2nd ed. New York: Oxford University Press; 2000. p. 149–64.
- (14) Rifkin A, Reardon G, Siris S, Karagji B, Kim YS, Hackstaff L, et al. Trimipramine in physical illness with depression. *J Clin Psychiatry* 1985;46:4–8.
- (15) Kathol RG, Mutgi A, Williams J, Clamon G, Noyes R, Jr. Diagnosis of major depression in cancer patients according to four sets of criteria. *Am J Psychiatry* 1990;147:1021–24.
- (16) Spitzer R, Williams J, Gibbons M, First MB, et al. Structured clinical interview for DSM-III-R (SCID). User's guide for the structured clinical interview for DSM-III-R. Washington (DC): American Psychiatric Press; 1990.
- (17) Rodin G, Craven J, Littlefield C. Depression in the medically ill: an integrated approach. New York (NY): Brunner/Mazel; 1991.
- (18) Cavanaugh S, Clark D, Gibbons R. Diagnosing depression in the hospitalized medically ill. *Psychosomatics* 1983;24:809–15.
- (19) Clark D, Cavanaugh S, Gibbons R. Core symptoms of depression in medical and psychiatric patients. *J Nerv Ment Dis* 1983;171:705–13.
- (20) Endicott J. Measurement of depression in patients with cancer. *Cancer* 1984;53:2243–8.
- (21) Rapp SR, Vrana S. Substituting nonsomatic for somatic symptoms in the diagnosis of depression in elderly male medical patients. *Am J Psychiatry* 1989;146:1197–200.
- (22) Golden RN, McCartney CF, Haggerty JJ Jr, Raft D, Nemeroff, CB, Ekstrom D, et al. The detection of depression by patient self-report in women with gynecologic cancer. *Int J Psychiatr Med* 1991;21:17–27.
- (23) Chochinov HM, Wilson KG, Enns M, Lander S. Prevalence of depression in the terminally ill: effects of diagnostic criteria and symptom threshold judgments. *Am J Psychiatry* 1994;151:537–40.
- (24) Plumb M, Holland J. Comparative studies of psychological function in patients with advanced cancer: 2. Interviewer rated current and past psychological symptoms. *Psychosom Med* 1981;43:243–54.
- (25) Massie MJ, Popkin MK. Depressive disorders. In: Holland JC, editor. *Psycho-oncology*. New York (NY): Oxford University Press; 1998. p. 518–40.
- (26) Ciaramella A, Poli P. Assessment of depression among cancer patients: the role of pain, cancer type and treatment. *Psychooncology* 2001;10:156–65.
- (27) Endicott J, Spitzer RL. A diagnostic interview: the schedule for affective disorders and schizophrenia. *Arch Gen Psychiatry* 1978;35:837–44.
- (28) Robins LN, Helzer JE, Croughan J, Ratcliff KS. National Institute of Mental Health Diagnostic Interview Schedule: its history, characteristics, and validity. *Arch Gen Psychiatry* 1981;38:381–9.
- (29) Alexander PJ, Dinesh N, Vidyasagar MS. Psychiatric morbidity among cancer patients and its relationship with awareness of illness and expectations about treatment outcome. *Acta Oncol* 1993;32:623–6.
- (30) Berard RMF, Boermeester F, Viljoen G. Depressive disorders in an out-patient oncology setting: prevalence, assessment, and management. *Psychooncology* 1998;7:112–20.
- (31) Lynch ME. The assessment and prevalence of affective disorders in advanced cancer. *J Palliat Care* 1995; 11:10–8.
- (32) Hall A, Hern RA, Fallowfield L. Are we using appropriate self-report questionnaires for detecting anxiety and depression in women with early breast cancer? *Eur J Cancer* 1999;35:79–85.
- (33) Massie MJ. Depression. In: Holland JC, Rowland JH, editors. *Handbook of psychooncology: psychological care of the patient with cancer*. New York (NY): Oxford University Press; 1989. p. 283–90.
- (34) Dugan W, McDonald MV, Passik SD, Rosenfeld BD, Theobald D, Edgerton S. Use of the Zung self-rating depression scale in cancer patients: Feasibility as a screening tool. *Psychooncology* 1998;7:483–93.

- (35) Zigmond AS, Snaith RP. The hospital anxiety and depression scale. *Acta Psychiatr Scand* 1983;67:361–70.
- (36) DeHaes JCJM, Van Knippenberg FCE, Neijt JP. Measuring psychological and physical distress in cancer patients: structured and application of the Rotterdam Symptom Checklist. *Br J Cancer* 1990;62:1034.
- (37) Beck AT, Ward CH, Mendelson M, Mock J, Erbaugh J. An inventory for measuring depression. *Arch Gen Psychiatry* 1961;4:561–71.
- (38) Beck AT, Beck RW. Screening depressed patients in family practice: a rapid technique. *Postgrad Med* 1972;52:81–5.
- (39) Derogatis LR, Melisaratos N. The Brief Symptom Inventory: an introductory report. *Psychol Med* 1983;13:595–605.
- (40) Derogatis LR: The Brief Symptom Inventory (BSI) Administration, scoring and procedures manual-II. Baltimore (MD): Clinical Psychometric Research; 1992.
- (41) Boulet J, Boss MW. Reliability and validity of the Brief Symptom Inventory. *Psychol Assess* 1991;3:433–7.
- (42) Radloff LS. The CES-D scale: a self-report depression scale for research in the general population. *Appl Psychol Measure* 1977;1:385–401.
- (43) Zung WWK. Depression in the normal aged. *Psychosomatics* 1967;8:287–92.
- (44) Zung WWK. Factors influencing the self-rating depression scale. *Arch Gen Psychiatr* 1967;16:543–7.
- (45) Zabora J. Screening procedures for psychosocial distress. In Holland J, editor. *Psycho-oncology*. New York (NY): Oxford University Press; 1998. p. 653–61.
- (46) Coyne JC, Thompson R, Palmer SC, Kagee A. Should we screen for depression? Caveats and potential pitfalls. *Appl Prev Psychol* 2000;9:101–21.
- (47) Trask PC, Paterson AG, Riba M, Brines B, Griffith K, Parker P, et al. Assessment of psychological distress in prospective bone marrow transplant patients. *Bone Marrow Transplant* 2002;29:917–25.
- (48) Passik SD, Kirsh KL, Donaghy KB, Theobald DE, Lundberg JC, Holtsclaw E, et al. An attempt to employ the Zung self-rating depression scale as a “Lab Test” to trigger follow-up in ambulatory oncology clinics: criterion validity and detection. *J Pain Symptom Manage* 2001;24:273–81.
- (49) Ibbotson T, Maguire P, Selby P, Priestman T, Wallace L. Screening for anxiety and depression in cancer patients: the effects of disease and treatment. *Eur J Cancer* 1994;30A:37–40.
- (50) Ramirez AJ, Richards MA, Jarrett SR, Fentiman IS. Can mood disorder in women with breast cancer be identified preoperatively? *Br J Cancer* 1995;72:1509–12.
- (51) Razavi D, Delvaux N, Farvacques C, Robaye E. Screening for adjustment disorders and major depressive disorders in cancer in-patients. *Br J Psychiatry* 1990;156:79–83.
- (52) Razavi D, Delvaux N, Bredart A, Pasemans M, Debusscher L, Bron D, et al. Screening for psychiatric disorders in lymphoma out-patient population. *Eur J Cancer* 1992;28A:1869–72.
- (53) Hopwood P, Howell A, Maguire P. Screening for psychiatric morbidity in patients with advanced breast cancer: validation of two self-report questionnaires. *Br J Cancer* 1991;64:353–6.
- (54) Katon, W, Sullivan MD. Depression and chronic medical illness. *J Clin Psychiatry* 1990;51 Suppl 6:3–11.
- (55) Coyne JC, Benazon NR, Gaba CG, Calzone K, Weber BL. Distress and psychiatric morbidity among women from high-risk breast and ovarian cancer families. *J Consult Clin Psych* 2000;68:864–74.
- (56) Moorey S, Greer S, Watson M, Gorman C, Rowden L, Tunmore R, et al. The factor structure and factor stability of the hospital anxiety and depression scale in patients with cancer. *Br J Psychiatry* 1991;158:255–9.
- (57) American Academy of Child and Adolescent Psychiatry. Practice parameters for the assessment and treatment of children and adolescents with depressive disorders. *J Am Acad Child Adolesc Psychiatry* 1998;37:10.
- (58) Puig-Antich J, Ryan N. Schedule for affective disorders and schizophrenia for school-age children (6–18 years): Kiddie-SADS—Present Episode (4<sup>th</sup> version). Pittsburgh (PA): Western Psychiatric Institute and Clinic; 1986.
- (59) Shaffer D, Schwab-Stone M, Fisher P, Cohen P, Placentini J, Davies M, et al. The diagnostic interview schedule for children—revised version (DISC-R): I. Preparation, field testing, interrater reliability, and acceptability. *J Am Acad Child Adolesc Psychiatry* 1993;32:643–50.
- (60) Achenbach TM, McConaughy SH, Howell CT. Child/adolescent behavioral and emotional problems: implications of cross-informant correlations for situational specificity. *Psychol Bull* 1987;101:213–32.
- (61) King CA, Katz SH, Ghaziuddin N, Brand E, Hill E, McGovern L. Diagnosis and assessment of depression and suicidality using the NIMH diagnostic interview schedule for children (DISC-2.3). *J Abnorm Child Psychol* 1997;25:173–81.
- (62) Kovacs M. Rating scales to assess depression in school-aged children. *Acta Paedopsychiatr* 1981;46:305–15.
- (63) Kovacs M. The children’s depression inventory (CDI). *Psychopharmacol Bull* 1985;21:995–8.
- (64) Weissman MM, Orvaschel H, Padian N. Children’s symptom and social functioning self-report scales: comparison of mothers’ and children’s reports. *J Ner Ment Dis* 1980;168:736–40.
- (65) Achenbach TM. Child behavior checklist for ages 12–16. Burlington (VT): University of Vermont; 1981.
- (66) Fristad MA, Emery BL, Beck SJ. Use and abuse of the children’s depression inventory. *J Consult Clin Psychol* 1997;65:699–702.
- (67) Allen R, Newman SP, Souhami RL. Anxiety and depression in adolescent cancer: findings in patients and parents at the time of diagnosis. *Eur J Cancer* 1997;33:1250–5.
- (68) Noll RB, Gartstein MA, Vannatta K, Correll J, Bukowski WM, Davies WH. Social, emotional, and behavioral functioning of children with cancer. *Pediatrics* 1999;103:71–8.
- (69) Grootenhuis MA, Last BF. Children with cancer with different survival perspectives: defensiveness, control strategies, and psychological adjustment. *Psychooncology* 2001;10:305–14.
- (70) Elkin TD, Phipps S, Mulhern RD, Fairclough D. Psychological functioning in adolescents and young adult survivors of pediatric malignancy. *Med Pediatr Oncol* 1997;29:582–8.
- (71) Fritz GK, Williams JR. Issues of adolescent development for survivors of childhood cancer. *J Am Acad Child Adolesc Psychiatry* 1988;27:712–5.
- (72) Fritz, GK, Williams JR, Amylon M. After treatment ends: psychosocial sequelae in pediatric cancer survivors. *Am J Orthopsychiatry* 1988;58:552–61.
- (73) Canning EH, Hanser SB, Shade KA, Boyce WT. Mental disorders in chronically ill children: parent-child discrepancy and physician identification. *Pediatrics* 1992;90:692–6.
- (74) Phipps S, Fairclough D, Mulhern RK. Avoidant coping in children with cancer. *J Pediatr Psychol* 1995;20:217–32.
- (75) Frank NC, Blount RL, Brown RT. Attributions, coping, and adjustment in children with cancer. *J Pediatr Psychol* 1997;22:563–76.
- (76) Phipps S, Srivastava DK. Approaches to the measurement of depressive symptomatology in children with cancer: attempting to circumvent the effects of defensiveness. *J Dev Behav Pediatr* 1999;20:150–6.
- (77) Harper RG, Kotik-Harper D, Kirby H. Psychometric assessment of depression in an elderly general medical population: over or underassessment? *J Nerv Ment Dis* 1990;178:113–9.
- (78) Schein RL, Koenig HG. The center for epidemiological studies-depression (CES-D) scale: assessment of depression in the medically ill elderly. *Int J Geriatr Psychiatry* 1997;12:436–46.
- (79) Ferrell BR, Ferrell B. The older patient. In: Holland JC, editor. *Psycho-oncology*. New York (NY): Oxford University Press; 1998. p. 839–44.
- (80) Passik SD, Lundberg JC, Rosenfeld B, Kirsh KL, Donaghy K, Theobald D, et al. Factor analysis of the Zung self-rating depression scale in a large ambulatory oncology sample. *Psychosomatics* 2000;41:121–7.
- (81) Yesavage JA, Brink TL, Rose TL, Lum O, Huang V, Adey M, et al. Development and validation of a geriatric depression screening scale: a preliminary report. *J Psychiatr Res* 1982-1983;17:37–49.
- (82) Sheikh JT, Yesavage JA. Geriatric Depression Scale: recent evidence and development of a shorter version. *Clin Gerontol* 1986;5:165–72.
- (83) Schulberg HC, Saul M, McClelland MN, Ganguli M, Christy W, Frank R, et al. Assessing depression in primary medical and psychiatric practices. *Arch Gen Psychiatry* 1985;42:1164–70.
- (84) Zich JM, Attkisson CC, Greenfield TK. Screening for depression in primary care clinics: the CES-D and the BDI. *Int J Psychiatric Med* 1990;20:259–77.
- (85) Zabora J, Brintzenhofesoc K, Curbow B, Hooker C, Piantadosi S. The prevalence of psychological distress by cancer site. *Psychooncology* 2001;10:19–28.

- (86) Brandberg Y, Mansson-Brahme E, Ringborg U, Sjoden PO. Psychological reactions in patients with malignant melanoma. *Eur J Cancer* 1995; 31A(2):157–62.
- (87) Baider L, Perry S, Sison A, Holland J, Uzieli B, DeNour AK. The role of psychological variables in a group of melanoma patient: an Israeli sample. *Psychosomatics* 1997;38:45–53.
- (88) Spiegel D, Sand S, Koopman C. Pain and depression in patients with cancer. *Cancer* 1994;74:2570–8.
- (89) Lansky SB, List MA, Herrmann CA, Ets-Hokin EG, DasGupta TK, Wilbanks GD, et al. Absence of major depressive disorder in female cancer patients. *J Clin Oncol* 1985;3:1553–60.
- (90) Pinder KL, Ramirez AJ, Black E, Richards MA, Gregory WM, Rubens RD. Psychiatric disorder in patients with advanced breast cancer: prevalence and associated factors. *Eur J Cancer* 1993;29A:524–7.
- (91) Sneed NV, Edlund B, Dias JK. Adjustment of gynecological and breast cancer patients to the cancer diagnosis: comparisons with males and females having other cancer sites. *Health Care Women Int* 1992;13:11–22.
- (92) Varni JW, Katz ER, Colegrove R Jr, Dolgin M. Perceived social support and adjustment of children with newly diagnosed cancer. *J Dev Behav Pediatrics* 1994;15:20–6.
- (93) McGoldrick M, Giordano J. Overview: Ethnicity and family therapy. In: McGoldrick M, Giordano J, Pearce JK, editors. *Ethnicity and family therapy*. New York (NY): The Guilford Press; 1996. p. 1–27.
- (94) Ayres A, Hoon PW, Franzoni JB, Matheny KB, Cotanch PH, Takayanagi S. Influence of mood and adjustment to cancer on compliance with chemotherapy among breast cancer patients. *J Psychosom Res* 1994;38:393–402.
- (95) Maguire P. Improving the detection of psychiatric problems in cancer patients. *Soc Sci Med* 1985;20: 819–23.
- (96) Passik SD, Dugan W, McDonald MV, Rosenfeld B, Theobald DE, and Edgerton S. Oncologists' recognition of depression in their patients with cancer. *J Clin Oncol* 1998;16:1594–600.
- (97) Koller M, Kussman J, Lorenz W, Jenkins M, Voss M, Arens E, et al. Symptom reporting in cancer patients: the role of negative affect and experienced social stigma. *Cancer* 1996;77:983–95.
- (98) Burrows AB, Datlin A, Salzman C, Nobel K, and Lipsitz LA. Depression in a long-term care facility: clinical features and discordance between nursing assessment and patient interviews. *J Am Geriatr Soc* 1995;43:1118–22.
- (99) Sensky T, Dennehy M, Gilbert A, Begent R, Newlands E, Rustin G, et al. Physicians' perceptions of anxiety and depression among their outpatients: relationships with patients and doctors' satisfaction with their interviews. *J R Coll Physicians Lond* 1989;23:33–8.
- (100) Slevin M, Plant H, Lynch D, Drinkwater J, Gregory WM. Who should measure quality of life, the doctor or the patient? *Br J Cancer* 1988;57: 109–12.
- (101) Lampic C, von Essen L, Peterson VW, Larsson G, Sjoden PO. Anxiety and depression in hospitalized patients with cancer: Agreement in patient-staff dyads. *Cancer Nurs* 1996;19:419–28.
- (102) Lampic C, Sjoden P-O. Patient and staff perceptions of cancer patients' psychological concerns and needs. *Acta Oncol* 2000;39:9–22.
- (103) Jennings BM, Muhlenkamp AF. Systematic misperception: oncology patients' self-reported affective states and their caregivers' perceptions. *Cancer Nurs* 1981;4(6):485–9.
- (104) Husted S, Johnson J. Oncology clients' affective states and their nurses' expectation of clients' affective states. *Cancer Nurs* 1985;8:159–65.
- (105) Faller H, Lang H, Schilling S. Emotional distress and hope in lung cancer patients, as perceived by patients, relatives, physicians, nurses, and interviewers. *Psychooncology* 1995;4:21–31.
- (106) Maguire P, Tait A, Brooke M, Thomas C, Sellwood R. Effect of counselling on the psychiatric morbidity associated with mastectomy. *Br Med J* 1980;281:1454–6.
- (107) Von Essen L, Burstrom L, and Sjoden P-O. Perceptions of caring behaviors and patient anxiety and depression in cancer patient-staff dyads. *Scand J Caring Sci* 1994;8:205–12.
- (108) Sollner W, DeVries A, Steixner E, Lukas P, Sprinzel G, Rumpold G, et al. How successful are oncologists in identifying patient distress, perceived social support, and need for psychosocial counseling? *Br J Cancer* 2001; 84:179–85.
- (109) Lampic C, Nordin K, and Sjoden P-O. Agreement between cancer patients and their physicians in the assessment of patient anxiety at follow-up visits. *Psychooncology* 1995;4:301–10.
- (110) Skarstein J, Aass N, Fossa SD, Skovlund E, and Dahl AA. Anxiety and depression in cancer patients: relation between the Hospital Anxiety and Depression Scale and the European Organization for Research and Treatment of Cancer Core Quality of Life Questionnaire. *J Psychosom Res* 2000;49:27–34.
- (111) Andrykowski MA. Psychiatric and psychosocial aspects of bone marrow transplantation. *Psychosomatics* 1994;35:13–24.
- (112) Fife BL, Huster GA, Cornetta KG, Kennedy VN, Akard LP, and Broun ER. Longitudinal study of adaptation to the stress of bone marrow transplantation. *J Clin Oncol* 2000;18:1539–49.
- (113) Neitzert CS, Ritvo P, Dancy J, Weiser K, Murray C, Avery J. The psychosocial impact of bone marrow transplantation: a review of the literature. *Bone Marrow Transplant* 1998; 22: 409–22.
- (114) Payne DK, Hoffman RG, Theodoulou M, Dosik M, Massie MJ. Screening for anxiety and depression in women with breast cancer. *Psychosomatics* 1999;40: 64–9.
- (115) Maunsell E, Brisson J, Dschenes L. Psychological distress after initial treatment of breast cancer. *Cancer* 1992;70:120–5.
- (116) Worden JW. Psychosocial screening of cancer patients. *J Psychosoc Oncol* 1983;1:1–10.
- (117) Levine PM, Silberfarb PM, Lipowski ZJ. Mental disorders in cancer patients. *Cancer* 1978;42:1385–91.
- (118) Massie MJ, Gorzynski G, Mastrovito R, Theis D, Holland J. The diagnosis of depression in hospitalized patients with cancer. *Proceedings of AACT and ASCO* 1979;20:432.
- (119) Massie MJ, Holland JC. Consultation and liaison issues in cancer care. *Psychiatr Med* 1987;5:343–59.
- (120) Desai MM, Bruce ML, Kasl SV. The effects of major depression and phobia on stage at diagnosis of breast cancer. *Int J Psychiatry Med* 1999;29:29–45.
- (121) Silberfarb PM, Maurer LH, Crouthamel CS. Psychosocial aspects of neoplastic disease: I. Functional status of breast cancer patients during different treatment regimens. *Am J Psychiatry* 1980;137:450–5.
- (122) Morton RP, Davies ADM, Baker J, Baker GA, Stell PM. Quality of life in treated head and neck cancer patients: a preliminary report. *Clin Otolaryngol* 1984;9:181–5.
- (123) Baile WF, Gibertini M, Scott L, Endicott J. Depression and tumor stage in cancer of the head and neck. *Psychooncology* 1992;1:15–24.
- (124) Evans DL, McCartney CF, Nemeroff CB, Raft D, Quade D, Golden RN, et al. Depression in women treated for gynecological cancer: clinical and neuroendocrine assessment. *Am J Psychiatry* 1986;143:447–52.
- (125) Joffe RT, Rubinow DR, Denicoff KD, Maher M, Sindelar WF. Depression and carcinoma of the pancreas. *Gen Hosp Psychiatry* 1986;8:241–5.
- (126) Grandi S, Fava GA, Cunsolo A, Ranieri M, Gozzetti G, Trombini G. Major depression associated with mastectomy. *Med Sci Res* 1987;15: 283–4.
- (127) Devlen J, Maguire P, Phillips P, Crowther D, Chambers H. Psychological problems associated with diagnosis and treatment of lymphomas. *BMJ* 1987;295:953–7.
- (128) Hardman A, Maguire P, Crowther D. The recognition of psychiatric morbidity on a medical oncology ward. *J Psychosom Res* 1989;33: 235–9.
- (129) Jenkins PL, May VE, Hughes LE. Psychological morbidity associated with local recurrence of breast cancer. *Int J Psychiatr Med* 1991;21:149–55.
- (130) Colon EA, Callies AL, Popkin MK, McGlave PB. Depressed mood and other variables related to bone marrow transplantation survival in acute leukemia. *Psychosomatics* 1991;32:420–5.
- (131) Sneeuw KCA, Aaronson NK, van Wouwe MCC, Sergeant JA, van Dongen JA, Bartelink H. Prevalence and screening of psychiatric disorder in patients with early stage breast cancer. *Qual Life Res* 1993;2:50–1.
- (132) Hosaka T, Aoki T. Depression among cancer patients. *Psychiatry Clin Neurosci* 1996;50:309–12.
- (133) Lloyd-Williams M, Friedman T, Rudd N. An analysis of the validity of the hospital anxiety and depression scale as a screening tool in patients with advanced metastatic cancer. *J Pain Symptom Manage* 2001;22:990–6.
- (134) Hopwood P, Howell A, Maguire P. Psychiatric morbidity in patients with advanced cancer of the breast: prevalence measured by two self-rating questionnaires. *Br J Cancer* 1991;64:349–52.
- (135) Lees N, Lloyd-Williams M. Assessing depression in palliative care patients using the visual analogue scale: a pilot study. *Eur J Cancer Care (Engl)* 1999;8:220–3.

- (136) Middelboe T, Ovesen L, Mortensen EL, Bech P. Depressive symptoms in cancer patients undergoing chemotherapy: a psychometric analysis. *Psychother Psychosom* 1994;61:171–7.
- (137) Kurtz ME, Kurtz JC, Stommel M, Given CW, Given B. Predictors of depressive symptomatology of geriatric patients with lung cancer—a longitudinal analysis. *Psychooncology* 2002;11:12–22.
- (138) Vernon SW, Perz CA, Gritz ER, Peterson SK, Christopher IA, Baile WF, et al. Correlates of psychologic distress in colorectal cancer patients undergoing genetic testing for hereditary colon cancer. *Health Psychol* 1997;16:73–86.
- (139) McLachlan S-A, Allenby A, Matthews J, Wirth A, Kissane D, Bishop M, et al. Randomized trial of coordinated psychosocial interventions based on patient self-assessments versus standard care to improve the psychosocial functioning of patients with cancer. *J Clin Oncol* 2001; 19: 4117–25.
- (140) Frost MH, Suman VJ, Rummans TA, Dose AM, Taylor M, Novotny P, et al. Physical, psychological and social well-being of women with breast cancer: the influence of disease phase. *Psychooncology* 2000;9:221–31.
- (141) Epping-Jordan JE, Compas BE, Osowiecki DM, Oppedisano G, Gerhardt C, Primo K, Krag DN. Psychological adjustment in breast cancer: Processes of emotional distress. *Health Psychol* 1999;18:315–26.
- (142) Doetch TM, Alger BH, Glasser M, Levenstein J. Detecting depression in elderly outpatients: findings from depression symptom scales and the Dartmouth COOP charts. *Fam Med* 1994;26:519–23.
